# Supplementary material
Source: ML conference proceedings conference paper supplement (https://proceedings.mlr.press/v80/nachum18a.html)
Supplement: Supplementary file [file nachum18a-supp.pdf]

---

# Smoothed Action Value Functions for Learning Gaussian Policies (Supplementary Material)

---

Ofir Nachum<sup>1</sup> Mohammad Norouzi<sup>1</sup> George Tucker<sup>1</sup> Dale Schuurmans<sup>1,2</sup>

---

<sup>1</sup>Google Brain <sup>2</sup>Department of Computing Science, University of Alberta. Correspondence to: Ofir Nachum <ofir-nachum@google.com>.

## A. Proof of Theorem 1

We want to show that for any  $s, a$ ,

$$\frac{\partial \tilde{Q}^\pi(s, a)}{\partial \Sigma(s)} = \frac{1}{2} \cdot \frac{\partial^2 \tilde{Q}^\pi(s, a)}{\partial a^2} \quad (1)$$

We note that similar identities for Gaussian integrals exist in the literature (Price, 1958; Rezende et al., 2014) and point the reader to these works for further information.

**Proof.** The specific identity we state may be derived using standard matrix calculus. We make use of the fact that

$$\frac{\partial}{\partial A} |A|^{-1/2} = -\frac{1}{2} |A|^{-3/2} \frac{\partial}{\partial A} |A| = -\frac{1}{2} |A|^{-1/2} A^{-1}, \quad (2)$$

and for symmetric  $A$ ,

$$\frac{\partial}{\partial A} \|v\|_{A^{-1}}^2 = -A^{-1} v v^T A^{-1}. \quad (3)$$

We omit  $s$  from  $\Sigma(s)$  in the following equations for succinctness. The LHS of (1) is

$$\begin{aligned} & \int_{\mathcal{A}} Q^\pi(s, \tilde{a}) \frac{\partial}{\partial \Sigma} N(\tilde{a}|a, \Sigma) d\tilde{a} \\ &= \int_{\mathcal{A}} Q^\pi(s, \tilde{a}) \exp \left\{ -\frac{1}{2} \|\tilde{a} - a\|_{\Sigma^{-1}}^2 \right\} \left( \frac{\partial}{\partial \Sigma} |2\pi\Sigma|^{-1/2} - \frac{1}{2} |2\pi\Sigma|^{-1/2} \frac{\partial}{\partial \Sigma} \|\tilde{a} - a\|_{\Sigma^{-1}}^2 \right) d\tilde{a} \\ &= \frac{1}{2} \int_{\mathcal{A}} Q^\pi(s, \tilde{a}) N(\tilde{a}|a, \Sigma) (-\Sigma^{-1} + \Sigma^{-1}(\tilde{a} - a)(\tilde{a} - a)^T \Sigma^{-1}) d\tilde{a}. \end{aligned}$$

Meanwhile, towards tackling the RHS of (1) we note that

$$\frac{\partial \tilde{Q}^\pi(s, a)}{\partial a} = \int_{\mathcal{A}} Q^\pi(s, \tilde{a}) N(\tilde{a}|a, \Sigma) \Sigma^{-1}(\tilde{a} - a) d\tilde{a}. \quad (4)$$

Thus we have

$$\begin{aligned} \frac{\partial^2 \tilde{Q}^\pi(s, a)}{\partial a^2} &= \int_{\mathcal{A}} Q^\pi(s, \tilde{a}) \left( \Sigma^{-1}(\tilde{a} - a) \frac{\partial}{\partial a} N(\tilde{a}|a, \Sigma) + N(\tilde{a}|a, \Sigma) \frac{\partial}{\partial a} \Sigma^{-1}(\tilde{a} - a) \right) d\tilde{a} \\ &= \int_{\mathcal{A}} Q^\pi(s, \tilde{a}) N(\tilde{a}|a, \Sigma) (\Sigma^{-1}(\tilde{a} - a)(\tilde{a} - a)^T \Sigma^{-1} - \Sigma^{-1}) d\tilde{a}. \end{aligned}$$

■

## B. Compatible Function Approximation

We claim that a  $\tilde{Q}_w^\pi$  is compatible with respect to  $\mu_\theta$  if

1.  $\nabla_a \tilde{Q}_w^\pi(s, a)|_{a=\mu_\theta(s)} = \nabla_\theta \mu_\theta(s)^T w$ ,
2.  $\nabla_w \int_{\mathcal{S}} \left( \nabla_a \tilde{Q}_w^\pi(s, a)|_{a=\mu_\theta(s)} - \nabla_a \tilde{Q}^\pi(s, a)|_{a=\mu_\theta(s)} \right)^2 d\rho^\pi(s) = 0$  (i.e.,  $w$  minimizes the expected squared error of the gradients).

Additionally,  $\tilde{Q}_w^\pi$  is compatible with respect to  $\Sigma_\phi$  if

1.  $\nabla_a^2 \tilde{Q}_w^\pi(s, a)|_{a=\mu_\theta(s)} = \nabla_\phi \Sigma_\phi(s)^T w$ ,

2.  $\nabla_w \int_S \left( \nabla_a^2 \tilde{Q}_w^\pi(s, a)|_{a=\mu_\theta(s)} - \nabla_a^2 \tilde{Q}^\pi(s, a)|_{a=\mu_\theta(s)} \right)^2 d\rho^\pi(s) = 0$  (i.e.,  $w$  minimizes the expected squared error of the Hessians).

**Proof.** We shall show how the conditions stated for compatibility with respect to  $\Sigma_\phi$  are sufficient. The reasoning for  $\mu_\theta$  follows via a similar argument. We also refer the reader to [Silver et al. \(2014\)](#) which includes a similar procedure for showing compatibility.

From the second condition for compatibility with respect to  $\Sigma_\phi$  we have

$$\int_S \left( \nabla_a^2 \tilde{Q}_w^\pi(s, a)|_{a=\mu_\theta(s)} - \nabla_a^2 \tilde{Q}^\pi(s, a)|_{a=\mu_\theta(s)} \right) \nabla_w \left( \nabla_a^2 \tilde{Q}_w^\pi(s, a)|_{a=\mu_\theta(s)} \right) d\rho^\pi(s) = 0.$$

We may combine this with the first condition to find

$$\int_S \nabla_a^2 \tilde{Q}_w^\pi(s, a)|_{a=\mu_\theta(s)} \nabla_\phi \Sigma_\phi(s) d\rho^\pi(s) = \int_S \nabla_a^2 \tilde{Q}^\pi(s, a)|_{a=\mu_\theta(s)} \nabla_\phi \Sigma_\phi(s) d\rho^\pi(s),$$

which is the desired property for compatibility. ■

### C. Derivative Bellman Equations

The conditions for compatibility require training  $\tilde{Q}_w^\pi$  to fit the true  $\tilde{Q}^\pi$  with respect to derivatives. However, in RL contexts, one often does not have access to the derivatives of the true  $\tilde{Q}^\pi$ . In this section, we elaborate on a method to train  $\tilde{Q}_w^\pi$  to fit the derivatives of the true  $\tilde{Q}^\pi$  without access to true derivative information.

Our method relies on a novel formulation: *derivative Bellman equations*. We begin with the standard  $\tilde{Q}^\pi$  Bellman equation presented in the main paper:

$$\tilde{Q}^\pi(s, a) = \int_{\mathcal{A}} N(\tilde{a} | a, \Sigma(s)) \mathbb{E}_{\tilde{r}, \tilde{s}'} \left[ \tilde{r} + \gamma \tilde{Q}^\pi(\tilde{s}', \mu(\tilde{s}')) \right] d\tilde{a}. \quad (5)$$

One may take derivatives of both sides to yield the following identity for any  $k$ :

$$\frac{\partial^k \tilde{Q}^\pi(s, a)}{\partial a^k} = \int_{\mathcal{A}} \frac{\partial^k N(\tilde{a} | a, \Sigma(s))}{\partial a^k} \mathbb{E}_{\tilde{r}, \tilde{s}'} \left[ \tilde{r} + \gamma \tilde{Q}^\pi(\tilde{s}', \mu(\tilde{s}')) \right] d\tilde{a}. \quad (6)$$

One may express the  $k$ -th derivative of a normal density for  $k \leq 2$  simply as

$$\frac{\partial^k N(\tilde{a} | a, \Sigma(s))}{\partial a^k} = N(\tilde{a} | a, \Sigma(s)) \Sigma(s)^{-k/2} \cdot H_k(\Sigma(s)^{-1/2}(\tilde{a} - a)), \quad (7)$$

where  $H_k$  is a polynomial. Therefore, we have the following derivative Bellman equations for any  $k \leq 2$ :

$$\frac{\partial^k \tilde{Q}_w^\pi(s, a)}{\partial a^k} = \int_{\mathcal{A}} N(\tilde{a} | a, \Sigma(s)) \Sigma(s)^{-k/2} \cdot H_k(\Sigma(s)^{-1/2}(\tilde{a} - a)) \mathbb{E}_{\tilde{r}, \tilde{s}'} \left[ \tilde{r} + \gamma \tilde{Q}_w^\pi(\tilde{s}', \mu(\tilde{s}')) \right] d\tilde{a}. \quad (8)$$

One may train a parameterized  $\tilde{Q}_w^\pi$  to satisfy these consistencies in a manner similar to that described in Section 4.2. Specifically, suppose one has access to a tuple  $(s, \tilde{a}, \tilde{r}, \tilde{s}')$  sampled from a replay buffer with knowledge of the sampling probability  $q(\tilde{a} | s)$  (possibly unnormalized) with full support. Then we draw a *phantom* action  $a \sim N(\tilde{a}, \Sigma(s))$  and optimize  $\tilde{Q}_w^\pi(s, a)$  by minimizing a weighted derivative Bellman error

$$\frac{1}{q(\tilde{a} | s)} \left( \frac{\partial^k \tilde{Q}_w^\pi(s, a)}{\partial a^k} - \Sigma(s)^{-k/2} \cdot H_k(\Sigma(s)^{-1/2}(a - \tilde{a})) (\tilde{r} + \gamma \tilde{Q}_w^\pi(\tilde{s}', \mu(\tilde{s}'))) \right)^2, \quad (9)$$

for  $k = 0, 1, 2$ . As in the main text, it is possible to argue that when using target networks, this training procedure reaches an optimum when  $\tilde{Q}_w^\pi(s, a)$  satisfies the recursion in the derivative Bellman equations (8) for  $k = 0, 1, 2$ .

| Hyperparameter                       | Range        | Sampling |
|--------------------------------------|--------------|----------|
| actor learning rate                  | [1e-6,1e-3]  | log      |
| critic learning rate                 | [1e-6,1e-3]  | log      |
| reward scale                         | [0.01,0.3]   | log      |
| OU damping                           | [1e-4,1e-3]  | log      |
| OU stddev                            | [1e-3,1.0]   | log      |
| $\lambda$                            | [1e-6, 4e-2] | log      |
| discount factor                      | 0.995        | fixed    |
| target network lag                   | 0.01         | fixed    |
| batch size                           | 128          | fixed    |
| clipping on gradients of $Q$         | 4.0          | fixed    |
| num gradient updates per observation | 1            | fixed    |
| Huber loss clipping                  | 1.0          | fixed    |

Table 1. Random hyperparameter search procedure. We also include the hyperparameters which we kept fixed.

## D. Implementation Details

We utilize feed forward networks for both policy and Q-value approximator. For  $\mu_\theta(s)$  we use two hidden layers of dimensions (400, 300) and relu activation functions. For  $\tilde{Q}_w^\pi(s, a)$  and  $Q_w^\pi(s, a)$  we first embed the state into a 400 dimensional vector using a fully-connected layer and tanh non-linearity. We then concatenate the embedded state with  $a$  and pass the result through a 1-hidden layer neural network of dimension 300 with tanh activations. We use a diagonal  $\Sigma_\phi(s) = e^\phi$  for Smoothie, with  $\phi$  initialized to  $-1$ .

To find optimal hyperparameters we perform a 100-trial random search over the hyperparameters specified in Table 1. The OU exploration parameters only apply to DDPG. The  $\lambda$  coefficient on KL-penalty only applies to Smoothie with a KL-penalty.

### D.1. Fast Computation of Gradients and Hessians

The Smoothie algorithm relies on the computation of the gradients  $\frac{\partial \tilde{Q}_w^\pi(s, a)}{\partial a}$  and Hessians  $\frac{\partial^2 \tilde{Q}_w^\pi(s, a)}{\partial a^2}$ . In general, these quantities may be computed through multiple backward passes of a computation graph. However, for faster training, in our implementation we take advantage of a more efficient computation. We make use of the following identities:

$$\frac{\partial}{\partial x} f(g(x)) = f'(g(x)) \frac{\partial}{\partial x} g(x), \quad (10)$$

$$\frac{\partial^2}{\partial x^2} f(g(x)) = \left( \frac{\partial}{\partial x} g(x) \right)^T f''(g(x)) \frac{\partial}{\partial x} g(x) + f'(g(x)) \frac{\partial^2}{\partial x^2} g(x). \quad (11)$$

Thus, during the forward computation of our critic network  $\tilde{Q}_w^\pi$ , we not only maintain the tensor output  $O_L$  of layer  $L$ , but also the tensor  $G_L$  corresponding to the gradients of  $O_L$  with respect to input actions and the tensor  $H_L$  corresponding to the Hessians of  $O_L$  with respect to input actions. At each layer we may compute  $O_{L+1}, G_{L+1}, H_{L+1}$  given  $O_L, G_L, H_L$ . Moreover, since we utilize feed-forward fully-connected layers, the computation of  $O_{L+1}, G_{L+1}, H_{L+1}$  may be computed using fast tensor products.

## References

- Price, R. A useful theorem for nonlinear devices having gaussian inputs. *IRE Transactions on Information Theory*, 4(2): 69–72, 1958.
- Rezende, D. J., Mohamed, S., and Wierstra, D. Stochastic backpropagation and approximate inference in deep generative models. In *International Conference on Machine Learning*, pp. 1278–1286, 2014.
- Silver, D., Lever, G., Heess, N., Degris, T., Wierstra, D., and Riedmiller, M. Deterministic policy gradient algorithms. In *ICML*, 2014.
